# Supplementary material for: SpG and SpRY variants expand the CRISPR toolbox for genome editing in zebrafish
Source: PubMed Central journal article supplement (PMC9198057; doi:10.1038/s41467-022-31034-8), 2022-06-14
Supplement: 41467_2022_31034_MOESM2_ESM.pdf [file 41467_2022_31034_MOESM2_ESM.pdf]

**Title:** Supplementary Data 1

**Description:** The relationship between nuclease-induced indels efficiency and phenotype observed in F0 embryos.

**Title:** Supplementary Data 2

**Description:** Primers for detection and mutations in this study.

**Title:** Supplementary Data 3

**Description:** All target sites used in this study.

**Title:** Supplementary Data 4

**Description:** Primers for NGS in this study.

**Title:** Supplementary Data 5

**Description:** The predicted off-target sites in this study.

**Title:** Supplementary Data 6

**Description:** *P* values calculated in the study.
